# Supplementary material for: Comparative Performance of Polygenic Risk Scores for Atherosclerotic Cardiovascular Disease Subtypes in the All of Us Research Program
Source: bioRxiv or medRxiv preprint supplement (doi:10.1101/2024.11.05.24316750), 2024-11-05
Supplement: Supplementary file [file media-2.pdf]

**Table Key: A description of all columns in all tables.**

**Table S3. Original PRS Performance**

|                 |                                                                                                |
|-----------------|------------------------------------------------------------------------------------------------|
| Trait           | ASCVD Subtype                                                                                  |
| PRS             | Polygenic risk score PGS Catalog ID                                                            |
| Ancestry Tested | Target population for PRS weights                                                              |
| HR/OR(95%)      | Hazard Ratio or Odds Ratio per standard deviation with 95% confidence intervals when available |

**Table S4. Integrated Risk Score Performance**

|                  |                                                                                   |
|------------------|-----------------------------------------------------------------------------------|
| Prediction Model | Integrated risk score model including clinical risk score and PGS used            |
| AUC_CI           | Area under the curve with 95% confidence interval for each integrated risk score  |
| n_total          | number of total individuals used for each analysis                                |
| Sen_10           | sensitivity of the analysis with a 10% risk threshold                             |
| Spe_10           | Specificity of the analysis with a 10% risk threshold                             |
| Accur_10         | Accuracy of the analysis with a 10% risk threshold                                |
| net_benefit_10   | Net benefit of the analysis with a 10% risk threshold                             |
| NRI_10           | Net reclassification index using categorical analysis of 10% risk threshold       |
| lowerci_10cat    | Lower confidence interval of the categorical NRI analysis with 10% risk threshold |
| upperci_10cat    | Upper confidence interval of the categorical NRI analysis with 10% risk threshold |
| Cont_NRI         | Net reclassification index using continuous analysis                              |
| lowerci_cont     | Lower confidence interval of the continuous NRI                                   |
| upperci_cont     | Upper confidence interval of the continuous NRI                                   |

**Table S3. Original PRS Performance**

| <b>Trait</b> | <b>PRS</b> | <b>Ancestry tested</b> | <b>HR/OR(95%)</b>                             |
|--------------|------------|------------------------|-----------------------------------------------|
| <b>AAA</b>   | PGS001784  | All                    | in decile comparison                          |
|              | PGS002054  | All                    | partial correlation as the performance metric |
|              | PGS003972  | All                    | in decile comparison                          |
| <b>CHD</b>   | PGS004696  | EUR                    | 1.65 (1.59-1.71)                              |
|              |            | AFR                    | 1.20 (1.15-1.26)                              |
|              |            | HIS                    | 1.51 (1.35-1.69)                              |
|              |            | EAS                    | 1.59 (1.54-1.64)                              |
|              |            | SAS                    | 2.67 (2.38-3.00)                              |
|              | PGS004698  | EUR                    | 1.65 (1.59-1.72)                              |
|              |            | AFR                    | 1.16 (1.11-1.21)                              |
|              |            | HIS                    | 1.38 (1.24-1.54)                              |
|              |            | EAS                    | 1.56 (1.50-1.61)                              |
|              |            | SAS                    | 2.75 (2.41-3.14)                              |
|              | PGS003725  | EUR                    | 2.14 (2.10-2.19)                              |
|              |            | AFR                    | 1.25 (1.21-1.29)                              |
|              |            | HIS                    | 1.61 (1.53-1.7)                               |
|              |            | SAS                    | 1.83 (1.69-1.99)                              |
|              | <b>IS</b>  | PGS003356              | All                                           |
| PGS004939    |            | All                    | 1.21 (1.19-1.22)                              |
| PGS000039    |            | All                    | 1.26 (1.22-1.31)                              |
| <b>PAD</b>   | PGS002053  | All                    | partial correlation as the performance metric |
|              | PGS004940  | All                    | 1.28 (1.26-1.30)                              |
|              | PGS002055  | All                    | partial correlation as the performance metric |

Table S4. Integrated Risk Score Performance

| Prediction_model   | AUC_CI                | n_total | Sen_10 | Spe_10 | Accur_10 | net_benefit_10 | NRI_10  | lowerci_10cat | upperci_10cat | Cont_NRI | lowerci_cont | upperci_cont |
|--------------------|-----------------------|---------|--------|--------|----------|----------------|---------|---------------|---------------|----------|--------------|--------------|
| PCE_CHD            | 0.683 (0.676 - 0.69)  | 164763  | 0.6204 | 0.6967 | 0.6943   | -0.014         | NA      | NA            | NA            | NA       | NA           | NA           |
| PCE_IRS_PGS003725  | 0.711 (0.704 - 0.717) | 164353  | 0.5877 | 0.7012 | 0.6977   | -0.014         | 0.0512  | 0.0044        | 0.0467        | 0.3228   | 0.0083       | 0.3145       |
| PCE_IRS_PGS003356  | 0.705 (0.698 - 0.711) | 164353  | 0.5718 | 0.7015 | 0.6974   | -0.014         | 0.0354  | 0.0047        | 0.0308        | 0.2496   | 0.0114       | 0.2382       |
| PCE_IRS_PGS004698  | 0.702 (0.696 - 0.709) | 164353  | 0.5710 | 0.6992 | 0.6952   | -0.015         | 0.0324  | 0.0024        | 0.0300        | 0.2646   | 0.0101       | 0.2545       |
| PCE_IRS_PGS004696  | 0.706 (0.7 - 0.713)   | 164353  | 0.5815 | 0.6970 | 0.6933   | -0.014         | 0.0407  | 0.0002        | 0.0405        | 0.2890   | -0.0068      | 0.2958       |
| PCE_IRS_CHDMulti   | 0.707 (0.7 - 0.713)   | 164353  | 0.5796 | 0.7021 | 0.6982   | -0.014         | 0.0438  | 0.0053        | 0.0386        | 0.2781   | 0.0022       | 0.2759       |
| PCE_IS             | 0.682 (0.675 - 0.689) | 164509  | 0.5396 | 0.6955 | 0.6903   | -0.015         | NA      | NA            | NA            | NA       | NA           | NA           |
| PCE_IRS_PGS002053  | 0.683 (0.676 - 0.689) | 164509  | 0.5374 | 0.6954 | 0.6901   | -0.015         | -0.0023 | -0.0001       | -0.0022       | 0.0323   | 0.0034       | 0.0289       |
| PCE_IRS_PGS004939  | 0.683 (0.677 - 0.69)  | 164509  | 0.5439 | 0.6967 | 0.6916   | -0.014         | 0.0056  | 0.0012        | 0.0044        | 0.0478   | -0.0036      | 0.0515       |
| PCE_IRS_PGS000039  | 0.683 (0.676 - 0.689) | 164509  | 0.5417 | 0.6967 | 0.6915   | -0.014         | 0.0033  | 0.0011        | 0.0022        | 0.0319   | 0.0019       | 0.0300       |
| PCE_IRS_ISMulti    | 0.687 (0.68 - 0.693)  | 164509  | 0.5472 | 0.6974 | 0.6924   | -0.014         | 0.0096  | 0.0019        | 0.0076        | 0.1092   | -0.0051      | 0.1144       |
| PCE_AA             | 0.756 (0.744 - 0.768) | 164828  | 0.6953 | 0.6873 | 0.6874   | -0.03          | NA      | NA            | NA            | NA       | NA           | NA           |
| PCE_IRS_PGS002054  | 0.758 (0.746 - 0.77)  | 164828  | 0.6970 | 0.6883 | 0.6884   | -0.029         | 0.0027  | 0.0010        | 0.0017        | 0.0534   | 0.0011       | 0.0524       |
| PCE_IRS_PGS001784  | 0.762 (0.75 - 0.774)  | 164828  | 0.6953 | 0.6894 | 0.6895   | -0.029         | 0.0021  | 0.0021        | 0.0000        | 0.1109   | -0.0016      | 0.1124       |
| PCE_IRS_PGS003972  | 0.776 (0.764 - 0.788) | 164828  | 0.7185 | 0.6897 | 0.6899   | -0.029         | 0.0255  | 0.0024        | 0.0232        | 0.2962   | -0.0033      | 0.2996       |
| PCE_IRS_AAAMulti   | 0.778 (0.766 - 0.79)  | 164828  | 0.7270 | 0.6878 | 0.6881   | -0.029         | 0.0322  | 0.0005        | 0.0318        | 0.3410   | 0.0019       | 0.3391       |
| PCE_PAD            | 0.727 (0.721 - 0.734) | 164763  | 0.6204 | 0.6967 | 0.6943   | -0.014         | NA      | NA            | NA            | NA       | NA           | NA           |
| PCE_IRS_PGS002055  | 0.728 (0.721 - 0.734) | 164763  | 0.6206 | 0.6972 | 0.6949   | -0.014         | 0.0007  | 0.0005        | 0.0002        | 0.0204   | 0.0009       | 0.0195       |
| PCE_IRS_PGS004940  | 0.731 (0.724 - 0.737) | 164763  | 0.6243 | 0.6976 | 0.6953   | -0.013         | 0.0048  | 0.0009        | 0.0039        | 0.1069   | 0.0120       | 0.0949       |
| PCE_IRS_PADMMulti  | 0.732 (0.726 - 0.739) | 164763  | 0.6233 | 0.7001 | 0.6977   | -0.013         | 0.0063  | 0.0034        | 0.0030        | 0.1214   | -0.0059      | 0.1273       |
| PCE_ASCVD          | 0.702 (0.698 - 0.706) | 164150  | 0.5508 | 0.7171 | 0.7034   | 0.016          | NA      | NA            | NA            | NA       | NA           | NA           |
| PCE_IRS_ASCVDMulti | 0.705 (0.701 - 0.709) | 164150  | 0.5550 | 0.7179 | 0.7045   | 0.017          | 0.0049  | 0.0008        | 0.0042        | 0.1337   | 0.0005       | 0.1333       |
